# Supplementary material for: Modeling multiple myeloma-bone marrow interactions and response to drugs in a 3D surrogate microenvironment
Source: PubMed Central journal article supplement — Haematologica. 2018 Jan 11;103(4):707–16. doi: 10.3324/haematol.2017.167486 (PMC5865414; doi:10.3324/haematol.2017.167486), 2018-04
Supplement: 2017_167486-Disclosures_and_Contributions.pdf [file 2017_167486-Disclosures_and_Contributions.pdf]

Haematologica  
HAEMATOL/2017/167486  
Version 6

Modeling Multiple Myeloma-Bone Marrow interactions and response to  
drugs in a 3D surrogate microenvironment

Daniela Belloni, Silvia Heltai, Maurilio Ponzoni, Antonello Villa, Barbara  
Vergani, Lorenza Pecciarini, Magda Marcatti, Stefania Girlanda,  
Giovanni Tonon, Fabio Ciceri, Federico Caligaris-Cappio, Marina  
Ferrarini, and Elisabetta Ferrero

Disclosures: none

Contributions: DB SH BV and LP performed research AV and MP performed data analyses  
MM and SG provided patients' information GT, FC and FCC revised the manuscript MF and  
EF supervised the work and wrote the manuscript
